# Supplementary material
Source: MDPI journal article supplement (https://www.mdpi.com/2071-1050/9/5/693)
Supplement: s1 [file s1]

COM1	COM2	COM3	COM4	OCS1	OCS2	OCS3	OCS4	OCS5	OCA1	OCA2	OCA3	OCA4	OCA5	OCA6	OCA7	OCA8	OCE1	OCE2	OCE3	SPD1	SPD2	SPD3	SPD4	SPD5	Gender	Age	Education level	Online buyer experience	No. of online providers
4	4	3	4	5	5	3	4	3	4	4	3	4	4	3	3	2	4	4	4	5	4	5	5	4	1	25	2	3	2
2	3	4	4	5	5	2	5	3	4	4	3	3	4	3	4	3	4	4	4	5	5	5	5	5	2	20	1	2	2
3	4	4	3	4	4	1	2	4	2	2	2	1	3	1	2	1	1	1	1	5	2	4	4	2	1	23	2	2	2
4	3	2	3	2	4	2	4	2	4	3	4	2	1	3	2	1	3	3	2	2	4	4	4	3	1	25	3	2	1
2	4	3	2	3	4	2	4	3	3	3	3	3	3	3	3	3	4	3	4	4	3	4	3	3	2	27	1	4	2
2	2	4	3	5	5	2	5	4	4	4	2	3	4	3	4	4	4	3	4	5	5	5	5	5	1	27	1	4	3
3	3	3	2	4	4	2	5	4	2	2	2	2	3	2	2	3	4	4	4	4	2	3	3	3	1	24	1	4	3
2	2	3	2	4	4	1	3	2	2	2	3	2	2	2	2	2	2	3	2	3	4	4	4	3	2	26	2	2	2
2	3	4	3	4	4	2	5	5	3	4	3	4	3	3	4	4	5	3	3	5	4	4	4	5	2	24	2	3	2
2	4	4	4	5	5	2	4	4	4	4	3	3	3	4	4	3	3	3	3	2	3	4	4	3	1	24	2	2	1
3	4	4	4	5	5	2	5	4	4	4	3	2	4	4	4	4	5	5	4	5	5	5	5	4	1	25	2	4	3
4	4	5	4	5	5	2	5	4	4	4	2	3	4	4	3	3	5	5	5	4	4	4	5	5	1	26	2	4	3
3	5	5	4	4	5	2	4	4	3	4	3	3	4	4	4	4	2	2	3	3	4	4	3	4	1	24	3	1	2
4	3	4	4	4	4	4	3	4	4	4	3	3	4	4	4	3	4	4	4	4	4	4	4	4	2	21	1	2	1
5	5	4	5	5	4	4	3	3	5	4	4	3	3	3	3	3	5	4	4	4	3	3	4	3	2	21	1	2	1
4	3	3	2	4	3	3	3	3	4	4	3	3	3	4	4	4	4	4	4	4	4	4	4	3	2	21	1	1	1
2	3	2	2	5	4	1	4	4	2	2	2	2	3	2	2	1	3	3	3	4	3	4	5	3	1	25	1	2	1
4	4	4	4	4	5	2	4	3	3	3	3	3	3	4	3	4	3	4	3	4	4	4	5	4	2	22	1	3	1
4	3	4	4	4	3	3	4	4	4	4	3	3	3	4	2	5	4	3	3	5	3	3	4	3	2	24	2	4	3
4	2	4	2	5	4	4	5	3	3	3	3	3	3	3	3	3	2	3	2	4	4	4	4	2	2	19	3	1	2
5	4	5	4	5	5	3	5	3	4	4	4	5	5	4	5	5	5	5	5	3	3	4	3	4	2	27	1	1	1
4	2	4	3	5	2	1	5	4	2	2	2	2	2	2	2	3	4	4	4	3	2	3	4	4	1	21	1	4	2
3	2	2	3	5	5	4	3	4	3	3	4	3	3	3	3	4	4	4	4	5	5	4	4	3	1	23	1	2	1
3	4	4	2	4	4	1	4	3	3	3	2	2	3	3	4	2	5	5	5	5	4	5	5	4	2	23	2	4	3
2	2	4	2	4	4	3	5	5	4	3	2	2	4	3	2	2	1	3	4	2	4	5	5	4	1	20	1	4	2
2	3	4	4	4	4	2	4	2	2	2	4	2	2	2	2	2	5	5	1	2	4	4	3	2	2	25	2	3	3
3	4	2	3	4	4	1	4	4	4	4	3	2	4	4	2	3	3	3	4	4	3	4	4	3	2	35	3	2	2
2	3	3	3	5	4	1	5	4	3	3	4	4	4	3	2	4	5	2	2	5	5	4	3	2	2	25	2	4	3
4	4	3	3	5	5	1	4	5	1	1	1	1	1	1	1	2	1	1	1	2	1	2	3	2	1	23	2	2	2
3	3	5	4	5	5	2	3	5	4	4	4	4	4	4	4	4	1	5	5	5	5	5	5	5	1	31	1	3	2
4	3	3	3	3	4	4	4	4	4	4	3	3	3	3	3	3	1	4	3	2	3	2	3	3	2	23	2	2	1
4	4	3	2	4	4	3	5	4	3	3	3	4	4	4	3	3	3	3	3	4	3	4	4	4	2	25	1	3	3
3	3	4	1	5	5	4	2	4	4	2	3	2	3	2	4	3	4	2	3	4	2	2	4	2	1	20	1	2	2
2	3	3	4	5	5	2	5	5	4	4	3	2	3	3	3	2	4	4	4	5	5	5	5	3	1	21	1	3	2
2	2	4	2	4	4	2	5	4	4	4	2	2	2	3	2	4	3	3	3	5	5	5	5	5	2	25	1	3	3
2	2	4	3	3	4	2	3	2	3	3	3	3	3	3	3	4	4	3	3	3	2	3	3	2	1	24	3	4	2
4	4	2	2	4	4	4	3	3	4	4	4	4	4	3	4	3	3	5	4	4	3	3	3	3	2	34	1	2	1
2	4	3	2	5	5	1	4	4	3	3	1	1	2	2	2	2	2	2	2	4	4	4	4	3	1	23	2	4	2
4	2	4	3	4	4	5	5	5	4	4	4	4	5	3	5	5	5	5	4	4	4	4	3	5	1	20	1	3	2
2	4	3	2	4	5	2	4	4	2	2	2	4	4	2	3	4	4	3	3	5	4	4	4	3	2	22	3	3	2
4	4	4	4	5	5	2	2	4	4	4	4	4	4	4	4	3	2	2	2	3	2	2	2	2	2	28	2	3	2
3	3	4	4	4	4	2	5	4	4	4	3	4	4	4	4	2	4	2	2	3	3	4	4	3	1	19	1	2	3
4	4	3	3	5	5	1	5	4	4	4	2	2	2	2	2	3	4	2	4	4	3	3	3	3	2	23	1	4	2
2	2	3	4	5	5	2	5	4	5	5	3	2	3	2	2	2	4	4	2	4	3	5	5	5	2	27	2	3	3
3	3	2	3	4	5	1	5	4	4	4	2	2	2	4	3	2	2	3	5	3	3	4	5	4	1	22	2	3	2
3	4	3	3	3	4	2	4	3	2	1	3	2	3	4	4	3	2	3	3	3	3	3	3	2	1	22	3	1	2
3	3	4	3	4	5	2	4	4	3	4	4	3	4	3	2	2	4	4	4	4	2	3	3	3	2	20	1	2	2
1	1	3	1	5	5	5	5	5	1	1	1	1	1	1	1	1	5	5	5	5	5	5	5	5	1	21	1	4	3
3	4	4	4	4	3	2	4	3	4	4	3	5	4	3	3	3	4	3	3	5	3	3	3	3	1	26	1	4	1
3	4	2	2	4	4	1	5	3	2	2	4	5	5	3	4	3	3	3	3	4	4	4	4	3	1	20	1	2	1
4	4	4	4	4	4	3	4	4	4	4	4	4	3	4	4	4	4	4	5	5	4	4	4	4	1	19	1	3	2
4	4	4	3	4	5	2	5	4	4	4	2	4	4	2	2	2	2	2	2	4	3	4	4	4	2	21	1	4	2
4	4	3	2	4	4	3	3	4	3	3	3	3	3	3	3	3	3	3	3	3	3	3	3	3	1	28	2	2	2
4	3	3	4	3	3	2	4	3	3	3	3	3	4	4	3	4	4	4	4	4	3	4	3	3	1	23	2	2	3
2	3	3	4	5	4	3	4	5	5	5	5	5	5	5	4	4	3	4	4	5	1	4	4	4	1	28	2	3	2
4	2	4	3	4	4	2	4	4	4	4	4	4	4	4	4	4	4	4	4	2	2	2	4	4	2	22	1	1	1
4	4	3	3	4	5	3	4	3	4	4	4	4	4	4	4	4	3	3	3	4	2	4	3	2	2	22	1	2	1
4	4	4	4	4	4	2	4	2	4	4	3	3	2	4	3	3	4	4	3	4	3	2	3	4	2	25	1	1	1
4	5	5	3	5	5	2	4	4	3	3	2	2	4	2	2	3	3	3	3	4	3	3	4	3	2	27	3	2	1
4	4	4	4	3	3	2	2	2	3	3	2	2	3	3	2	2	2	2	2	5	4	3	1	4	2	24	1	2	2
3	4	4	5	4	5	5	5	4	4	4	4	3	5	5	4	4	5	5	4	4	3	3	4	5	1	23	1	4	3
4	3	4	4	5	5	4	4	3	4	4	3	3	4	4	4	5	4	4	3	4	3	4	4	4	2	20	1	2	1
3	4	2	4	4	5	2	5	3	2	2	3	3	4	3	3	4	4	2	3	5	5	4	5	3	2	25	1	3	2
4	4	2	2	5	5	4	4	4	4	4	4	4	4	4	4	3	5	5	5	4	4	4	4	4	1	23	1	4	3
2	3	2	2	5	2	1	4	4	4	4	3	4	5	5	2	2	4	2	2	5	2	5	4	2	2	33	2	3	2
4	2	4	4	5	5	3	4	5	4	4	4	4	4	4	4	4	4	2	3	3	3	3	4	2	2	27	1	2	2
2	4	2	4	4	4	2	4	4	4	4	4	4	2	4	4	4	4	4	4	4	4	4	4	2	1	62	3	4	3
4	4	4	4	5	5	2	5	3	3	3	2	2	3	2	2	4	2	2	2	4	3	4	4	4	2	21	1	3	2
3	4	2	4	2	3	3	4	3	3	4	3	3	4	4	4	3	4	3	3	3	3	4	4	4	1	34	1	4	1
4	3	4	4	2	4	2	5	4	4	4	3	3	3	3	3	2	4	4	3	4	2	4	4	4	2	23	2	3	1
4	3	3	3	2	3	2	4	3	3	3	2	3	3	3	3	3	2	2	3	2	2	2	2	3	1	25	2	4	1
4	4	4	4	3	4	3	4	4	3	3	4	3	4	3	3	3	4	4	3	5	4	4	4	4	1	24	1	4	1
2	2	4	1	4	5	1	4	4	3	2	1	1	2	1	4	2	1	1	1	4	3	4	2	4	1	24	2	3	2
2	2	3	2	5	5	4	5	4	4	4	3	3	4	3	4	4	5	5	2	5	5	4	4	4	2	25	1	3	2
3	2	3	4	3	4	3	4	2	3	3	2	4	3	2	4	5	1	2	2	3	3	4	2	1	1	21	1	3	2
4	4	4	3	4	4	3	3	4	4	3	4	3	4	3	4	4	4	4	4	4	4	4	4	4	2	28	2	3	2
2	3	4	2	4	4	2	4	4	2	2	2	3	2	2	2	2	3	3	3	4	3	5	5	2	2	23	1	2	2
4	2	5	5	4	5	3	4	3	4	4	2	2	3	3	3	4	4	4	4	3	2	4	3	3	1	25	2	3	2
4	2	4	2	5	5	5	5	5	4	4	4	4	4	2	2	2	4	4	4	5	5	5	5	5	2	22	1	3	3
3	3	3	4	4	3	3	3	3	4	3	3	3	4	4	3	4	3	4	3	4	4	4	3	3	2	22	3	3	1
2	3	5	3	5	5	5	5	3	3	3	3	5	5	3	3	3	5	5	5	5	5	5	5	5	1	20	1	3	2
4	4	4	3	5	4	2	4	3	3	3	2	2	2	2	2	2	2	3	3	3	3	4	4	2	1	22	1	2	2
3	4	5	3	5	5	3	5	3	2	2	2	2	2	2	2	2	2	2	3	4	3	4	4	4	2	21	1	2	2
4	3	5	5	5	5	2	5	5	5	5	5	4	3	3	4	5	5	4	4	5	5	5	5	4	1	28	3	3	3
4	4	2	4	1	3	1	5	2	4	4	4	4	4	4	2	2	1	1	1	5	5	5	2	4	2	19	1	4	3
2	2	3	4	3	4	2	4	4	3	3	3	3	2	2	3	3	4	4	4	2	2	3	3	2	1	22	1	2	2
2	4	3	4	5	5	3	5	3	4	4	3	3	3	3	3	4	4	4	5	4	3	4	3	3	2	22	3	3	3
4	3	4	4	5	4	2	4	3	2	2	3	2	4	2	4	2	3	3	3	2	2	2	2	2	2	20	1	1	1
4	4	4	4	4	4	4	4	4	3	3	3	3	3	3	3	3	4	4	4	4	3	3	3	3	2	19	1	2	2
4	4	4	1	4	4	2	5	5	4	4	3	3	4	4	3	3	3	3	4	4	4	4	4	3	1	24	2	3	3
2	2	4	5	1	2	3	5	2	1	2	4	5	1	2	3	4	1	3	2	1	4	4	3	4	1	23	1	3	1
4	4	3	4	5	5	4	5	5	4	4	5	4	4	3	4	4	4	5	5	4	4	4	5	4	2	28	1	3	2
3	3	3	3	4	4	2	4	4	3	3	3	3	3	3	3	3	3	3	3	5	4	4	3	3	2	19	1	2	2
4	5	3	3	4	4	5	4	4	4	4	4	4	3	3	4	4	4	4	3	4	3	4	3	3	1	26	3	4	2
2	1	1	4	3	2	3	2	3	4	3	2	3	3	3	2	5	1	5	2	5	2	3	4	5	1	19	1	2	1
4	4	3	3	5	5	2	4	3	4	4	3	3	3	3	3	3	2	2	3	3	3	4	4	4	2	26	3	2	2
2	4	2	2	4	4	2	5	3	5	5	3	3	5	3	4	2	4	4	4	4	3	4	4	4	2	24	3	3	2
2	2	4	3	5	4	2	4	2	2	2	3	3	3	3	3	4	2	5	3	4	3	3	4	3	2	21	1	1	1
4	3	4	4	5	5	3	4	4	4	4	3	3	4	4	3	3	3	4	4	2	1	3	3	1	1	20	3	3	2
4	4	4	3	5	4	2	3	4	4	4	3	3	4	2	3	4	3	3	5	4	3	4	4	2	1	25	3	3	3
2	4	3	1	2	5	3	4	5	3	3	3	3	3	3	3	3	4	4	4	4	2	4	4	4	2	25	2	3	3
5	4	4	5	5	5	3	4	5	5	5	3	4	5	5	5	5	5	5	3	5	5	5	5	3	1	28	2	3	3
4	4	4	2	4	5	2	5	5	4	4	3	3	4	4	4	4	2	2	5	4	3	4	4	3	2	20	1	2	2
2	1	4	2	4	4	3	4	4	4	4	3	3	4	3	3	2	2	2	2	2	2	3	3	3	2	24	3	3	1
4	4	4	4	5	4	3	5	4	2	2	3	3	3	2	2	2	4	4	4	4	3	3	3	2	2	21	1	2	1
2	2	2	2	4	4	2	4	4	2	2	2	2	2	2	2	2	4	4	3	2	2	2	2	2	2	23	1	1	1
2	2	4	3	4	4	1	5	4	3	3	3	3	4	3	3	4	4	4	4	5	4	4	4	4	2	25	1	3	1
4	4	4	4	4	2	1	4	3	5	5	5	5	5	5	5	5	5	5	5	4	4	3	2	2	2	22	1	2	2
3	4	4	3	5	3	2	5	1	3	3	3	3	3	3	3	3	5	3	5	5	5	5	4	3	1	22	1	3	3
3	2	3	1	4	4	2	4	5	4	4	3	3	4	4	4	4	5	5	5	4	4	4	4	3	1	24	1	3	1
4	4	3	5	4	4	2	4	3	4	4	3	3	3	3	3	3	4	3	4	4	4	3	3	3	2	19	1	3	2
4	5	5	5	5	5	3	5	4	4	4	5	5	5	4	5	4	5	5	5	5	4	5	5	4	1	20	1	4	2
4	2	3	3	2	2	2	5	2	4	4	4	4	4	3	4	4	5	5	5	5	5	5	5	4	1	24	1	3	2
2	4	2	4	5	5	2	4	4	5	5	3	3	3	3	3	3	3	4	4	2	2	4	2	2	2	19	1	2	1
2	4	3	4	4	5	3	2	1	4	3	3	2	3	3	2	2	3	2	2	4	2	4	4	3	2	19	1	1	2
2	2	3	2	5	5	2	5	5	4	4	3	3	3	3	3	4	1	1	1	5	5	5	5	3	2	20	1	2	2
4	3	4	2	4	4	2	4	3	3	4	2	3	3	4	4	3	2	2	2	4	3	4	4	4	2	24	1	2	2
4	4	4	3	5	5	2	5	4	3	3	3	3	3	3	3	3	3	4	4	3	3	4	4	4	2	23	1	3	1
3	4	2	3	4	4	3	5	3	3	3	3	3	3	3	3	3	4	4	4	4	3	3	3	4	2	23	1	2	2
2	2	4	4	5	4	1	4	5	2	2	1	1	2	1	1	1	4	4	5	3	2	5	3	1	1	23	2	2	1
4	3	3	4	4	4	3	4	4	4	4	3	4	4	4	3	3	4	3	3	4	3	4	4	3	1	19	2	2	1
4	4	4	5	5	5	1	5	5	4	4	3	4	3	3	3	4	2	2	2	5	5	4	4	4	1	20	1	3	2
4	4	4	4	4	3	2	4	3	2	2	2	2	2	2	2	2	4	4	2	3	3	3	3	3	1	25	3	4	2
2	5	2	4	5	4	1	4	4	4	4	2	3	4	4	3	2	3	3	4	5	5	4	5	5	1	27	1	4	2
3	3	2	2	4	4	3	4	2	2	2	2	3	3	2	2	2	4	4	3	2	2	4	4	2	1	28	2	3	1
4	3	4	2	4	4	2	4	4	2	2	3	2	2	2	2	3	4	4	2	4	3	4	4	4	2	30	2	3	2
4	3	4	3	4	4	2	5	5	4	4	4	5	5	4	4	5	5	5	5	5	3	4	5	3	1	37	2	4	3
4	4	3	3	4	3	4	4	4	3	4	3	3	3	4	3	4	4	3	4	3	4	4	3	4	1	20	1	3	2
2	4	2	2	4	4	2	5	4	4	4	3	3	4	4	4	4	4	4	4	4	4	4	4	3	2	19	1	4	3
2	3	4	4	4	3	2	5	4	3	3	2	2	3	3	2	2	2	4	3	3	2	3	4	3	1	21	1	3	3
3	3	2	3	4	5	2	5	4	2	2	2	2	2	2	2	2	2	2	2	4	3	5	4	4	1	27	2	4	2
2	2	3	3	4	4	2	5	5	4	4	3	2	4	3	2	2	4	4	3	4	3	4	4	4	1	22	1	3	2
2	4	4	4	4	4	4	4	3	3	3	3	3	4	4	4	4	3	3	3	3	3	3	3	3	2	22	1	2	2
3	2	4	2	5	5	3	5	4	4	4	5	4	5	3	4	4	4	3	4	4	2	4	3	3	2	23	1	2	2
2	1	3	2	5	4	2	4	4	2	2	2	2	2	2	3	1	2	3	2	5	4	4	4	2	2	19	1	3	1
4	3	3	2	4	4	2	4	4	3	3	3	2	3	3	4	4	2	3	4	4	3	3	2	3	2	26	2	4	2
4	4	4	4	4	4	2	4	4	4	4	3	3	3	3	4	4	5	4	1	4	4	4	4	3	1	22	1	3	3
2	4	3	4	5	5	1	4	5	3	3	2	4	3	3	2	1	5	1	1	4	3	4	4	3	2	25	2	3	2
4	2	4	2	5	5	3	4	5	4	4	2	2	3	3	2	3	4	3	2	4	3	4	5	2	1	20	2	2	1
4	3	4	2	5	5	3	5	5	2	2	1	2	2	2	2	1	4	4	4	4	2	3	3	2	2	21	1	1	1
4	2	1	2	5	5	2	4	4	3	4	2	2	3	2	3	4	1	1	1	3	2	4	4	2	2	19	3	2	2
4	3	5	4	4	2	1	3	2	1	2	5	2	3	1	4	2	1	4	4	2	2	2	1	4	1	19	1	2	1
4	4	4	4	5	5	2	4	5	5	2	5	3	4	4	3	5	1	3	4	5	5	5	5	5	2	20	1	3	1
3	3	3	3	4	4	4	4	3	3	3	3	3	3	3	3	3	4	4	4	4	4	4	4	4	1	28	1	1	2
4	4	3	4	5	5	4	5	5	4	4	4	5	5	5	4	4	4	4	4	4	4	4	4	4	2	20	3	3	2
4	2	3	2	4	4	3	4	3	4	4	3	2	3	2	3	2	4	2	2	4	4	4	4	3	2	25	1	4	3
2	3	4	2	4	4	2	4	4	2	2	4	4	4	2	3	4	1	2	2	2	1	3	3	3	2	35	1	4	1
4	2	4	3	4	4	2	4	3	3	2	1	1	4	3	3	2	2	2	2	4	3	4	3	4	2	20	1	4	2
4	4	3	2	5	5	2	5	4	3	3	2	3	4	3	3	2	2	2	3	3	3	4	4	4	2	28	1	3	1
4	2	4	4	4	4	3	4	4	3	3	3	3	3	3	3	3	2	2	2	2	2	2	2	2	2	20	1	1	1
4	3	5	2	5	5	3	4	5	3	3	3	3	3	3	3	3	4	4	4	4	2	4	4	3	2	20	1	2	1
5	4	5	4	4	4	2	5	3	3	3	2	4	4	2	2	2	2	1	1	4	3	4	4	4	2	35	1	4	3
2	2	4	2	4	4	3	4	4	3	3	3	3	4	4	4	3	4	4	4	4	3	4	4	3	1	30	2	4	2
4	4	5	5	5	5	1	4	1	3	3	3	3	4	4	3	4	1	4	1	4	3	4	4	3	2	22	1	2	2
2	4	4	5	4	5	4	3	4	4	4	2	2	2	2	3	4	5	4	4	3	3	4	4	3	2	21	3	2	1
4	4	4	4	4	4	3	4	3	4	4	3	4	4	4	4	4	4	4	4	4	4	4	4	4	1	27	3	4	2
3	2	4	4	4	4	3	4	3	3	3	3	3	3	3	3	3	3	3	3	4	4	4	4	3	2	20	1	2	2
4	4	5	4	5	2	1	5	4	4	4	4	4	4	4	4	4	1	1	1	5	4	4	4	3	2	21	1	3	3
4	3	5	3	2	4	1	4	2	4	4	2	4	4	4	3	2	3	3	2	2	1	1	3	1	2	21	1	4	2
2	2	3	3	4	4	2	5	3	3	3	3	3	3	3	3	3	4	2	2	4	3	3	3	3	2	22	1	2	1
2	3	4	2	4	2	3	4	4	3	3	2	2	3	3	2	2	3	3	3	2	2	4	3	3	2	21	1	1	1
3	4	5	4	5	5	4	5	4	5	3	1	2	2	4	3	5	1	1	3	5	5	5	3	5	1	21	1	2	3
4	3	3	2	4	4	4	5	3	2	2	3	3	2	3	3	4	4	3	3	4	4	4	3	3	2	21	1	2	3
4	2	4	3	5	5	2	2	2	3	3	2	2	2	2	2	3	2	4	4	4	3	3	3	2	2	19	1	2	3
3	2	4	3	4	3	2	3	4	3	4	4	3	3	3	3	3	4	4	3	2	2	4	3	2	1	19	1	1	1
4	4	5	3	5	4	2	5	4	3	3	3	3	3	3	3	3	2	2	2	4	3	4	4	3	2	20	1	2	2
2	4	2	3	5	5	3	5	4	3	3	3	3	3	2	2	2	2	2	5	3	1	4	3	2	1	24	3	1	1
3	4	4	3	5	5	2	4	4	3	3	3	2	3	2	2	3	3	2	2	3	2	2	2	2	2	21	1	2	1
4	4	3	3	5	5	4	5	5	4	4	4	5	5	5	5	4	3	3	3	3	3	4	4	4	2	20	1	2	1
2	4	4	1	5	2	2	5	4	3	2	2	3	2	2	1	1	2	2	4	4	4	4	4	4	2	22	1	2	3
4	4	4	4	5	4	2	4	2	4	4	3	3	3	3	3	3	3	3	3	4	1	2	1	2	2	20	1	2	2
2	3	4	2	5	5	4	4	4	2	2	4	3	4	3	3	3	2	4	4	4	3	4	4	3	2	20	1	4	2
4	2	3	4	4	4	1	1	4	1	1	1	1	1	1	1	1	4	4	4	3	3	3	3	1	1	23	2	2	1
2	3	2	2	2	3	3	3	3	4	4	3	3	3	3	3	3	3	3	3	3	3	3	3	3	1	22	1	1	1
3	3	2	2	5	4	2	4	3	4	4	4	4	4	4	4	4	5	5	3	5	5	4	3	1	2	19	1	3	2
2	2	3	4	5	4	1	5	3	2	2	1	2	2	2	4	4	3	4	3	4	2	4	4	2	2	22	1	3	1
1	2	3	2	4	4	2	4	4	3	3	2	2	2	3	3	2	3	3	2	4	3	3	3	3	2	19	1	2	1
4	3	4	3	3	4	3	3	3	3	3	4	4	4	3	2	2	2	4	4	1	2	3	5	1	1	55	3	4	1
4	4	4	3	4	4	4	4	4	3	4	3	3	3	3	4	4	4	4	4	5	5	5	5	5	2	30	2	4	3
2	4	4	5	4	4	1	5	3	3	3	1	1	1	1	1	1	2	2	2	4	3	1	4	3	2	22	1	4	1
3	2	3	3	4	4	4	4	3	3	4	3	3	3	4	2	3	4	3	4	3	3	3	4	3	2	19	1	2	3
5	4	4	5	5	4	5	4	5	5	4	5	5	5	4	4	5	5	5	5	5	4	4	5	4	1	24	1	3	2
3	2	5	3	4	5	2	5	4	4	5	2	3	5	2	3	3	3	4	4	5	4	5	4	4	1	21	3	4	2
2	2	4	4	4	4	2	4	3	3	4	4	4	4	4	4	3	4	4	5	4	2	4	4	3	2	22	2	1	2
3	2	4	4	5	5	4	5	5	4	4	4	4	4	4	4	4	3	3	3	4	4	5	5	4	2	20	3	2	2
2	3	4	3	5	5	4	5	3	4	4	2	2	3	2	2	2	4	4	3	4	2	3	3	3	2	20	1	4	2
3	3	4	4	1	3	1	5	3	1	1	1	3	3	3	3	3	1	3	3	4	3	3	3	3	2	23	2	1	1
4	3	4	4	5	5	3	5	4	4	4	3	3	3	3	3	3	4	4	4	4	4	4	4	2	2	20	1	3	2
4	3	4	4	4	4	3	4	3	3	3	4	4	4	3	3	3	3	4	4	4	4	4	3	4	2	20	1	2	1
2	4	5	5	5	4	4	5	2	1	1	1	1	1	1	1	1	1	1	1	2	1	4	4	3	2	22	1	3	2
2	3	3	4	4	5	2	5	4	3	3	3	3	3	3	3	3	2	2	2	2	1	2	2	2	2	19	3	2	1
3	4	3	4	4	4	4	4	4	4	4	4	4	4	4	4	4	4	4	4	4	4	4	4	4	2	20	1	4	2
3	4	4	4	4	4	4	4	4	2	2	2	2	2	2	2	2	2	2	2	3	3	4	4	4	2	22	1	2	1
4	4	4	4	4	4	4	4	4	4	4	4	4	4	4	4	4	4	4	4	3	3	3	3	3	1	21	1	2	2
3	2	2	3	5	4	4	4	4	5	4	5	4	4	4	5	4	4	4	3	4	4	5	5	4	1	23	1	4	3
4	3	3	5	4	4	3	5	4	4	4	3	3	4	4	4	2	1	2	4	4	2	4	4	3	1	23	1	3	1
4	2	2	5	5	5	2	5	4	4	4	4	2	4	1	1	1	1	1	1	4	3	5	5	4	2	20	1	4	1
4	4	3	2	4	3	1	5	5	3	3	2	2	2	2	2	2	3	2	2	4	3	4	4	3	1	28	1	4	1
4	3	2	2	3	4	2	3	3	2	2	2	3	3	3	3	3	3	3	3	2	2	2	2	2	2	22	3	2	2
4	4	4	4	4	4	3	4	3	2	4	2	4	4	2	3	4	4	4	4	4	2	4	4	3	2	21	1	3	3
4	2	2	2	4	4	1	4	4	3	3	4	4	4	3	3	4	2	3	4	4	2	4	4	3	2	23	3	4	3
4	2	5	2	5	5	2	5	4	5	5	4	5	4	4	4	2	1	5	5	4	4	4	5	2	1	23	1	3	2
5	3	4	5	5	3	2	3	5	2	3	3	3	3	3	3	3	3	3	3	3	3	3	3	3	2	19	1	2	1
4	3	4	3	4	3	3	3	2	2	2	2	2	2	2	2	2	2	2	2	3	2	2	2	3	2	23	1	3	1
2	4	2	4	5	5	4	4	3	5	5	3	3	4	4	3	4	4	1	1	4	3	4	4	4	2	20	1	2	3
4	5	5	4	5	5	2	5	5	2	2	2	2	2	2	2	2	4	4	4	5	4	5	5	2	2	20	1	2	2
2	4	4	4	5	5	3	5	3	4	4	4	3	4	4	3	3	5	5	5	5	5	5	5	3	2	23	1	3	3
3	3	2	3	4	4	2	4	3	3	3	2	2	3	2	2	3	2	2	3	4	3	4	4	3	2	21	2	3	2
2	3	2	2	5	5	5	5	4	3	3	4	3	4	4	3	4	5	3	2	5	5	5	5	3	2	22	2	4	3
3	2	4	2	4	4	1	3	3	4	4	2	2	3	2	2	2	2	2	2	3	2	3	3	2	2	26	1	4	2
4	3	4	4	3	4	3	4	4	4	4	4	3	4	4	4	4	4	3	3	4	4	4	4	4	1	25	1	4	2
2	5	5	4	4	5	1	5	5	2	2	1	2	2	2	2	1	3	3	3	2	1	1	2	2	1	20	1	2	1
4	4	3	5	2	5	1	5	5	4	4	1	1	1	1	1	1	5	5	5	5	5	5	5	5	1	29	2	3	2
3	3	4	4	4	4	3	4	4	3	4	4	4	4	4	4	4	4	3	3	4	2	4	3	3	2	26	1	2	2
4	4	4	4	4	4	4	4	4	4	4	4	4	4	4	4	4	4	4	4	4	3	4	4	3	1	23	1	3	2
2	3	5	4	5	5	2	4	5	1	1	1	1	1	1	1	1	5	1	1	5	4	4	4	5	1	26	3	4	3
4	2	2	2	5	5	4	5	3	4	4	2	3	4	2	2	1	5	5	4	4	3	4	2	2	2	19	1	3	2
3	3	3	3	5	5	2	4	4	4	4	3	4	4	4	4	4	3	4	4	4	3	4	3	3	1	20	1	2	2
2	2	3	3	1	2	2	3	4	4	4	3	2	2	2	2	2	4	4	4	4	2	2	4	4	1	30	3	4	1
2	4	2	4	5	5	2	4	3	4	4	2	2	3	3	3	3	1	1	1	5	3	3	3	2	2	23	2	3	3
3	4	5	4	5	5	2	4	4	4	4	4	5	4	4	3	4	2	2	2	2	2	4	3	3	1	19	1	1	1
2	2	4	3	4	4	2	4	4	4	4	4	4	4	4	4	4	3	4	4	4	2	2	2	2	2	22	1	2	3
5	4	5	5	5	5	5	5	5	4	4	4	4	4	4	4	4	5	5	4	4	4	4	4	4	1	24	1	1	3
4	3	2	1	3	4	2	4	4	3	4	4	4	4	3	3	3	3	3	3	5	5	4	4	3	1	28	1	3	2
4	2	4	4	4	4	1	5	2	4	4	4	4	4	4	4	4	5	4	4	4	2	4	4	2	2	23	2	2	1
2	2	4	4	5	4	2	3	4	3	3	4	4	4	4	3	3	3	3	4	3	2	3	4	2	2	19	1	2	2
4	4	2	1	1	2	1	2	1	2	2	3	3	3	3	4	4	4	5	5	1	1	1	1	1	1	24	1	1	2
2	2	4	4	4	4	3	4	3	4	4	2	2	2	2	2	2	4	4	4	4	4	4	4	4	1	28	2	4	3
4	4	3	4	5	5	2	5	5	4	4	2	2	5	2	2	3	4	5	2	5	3	5	5	5	1	23	1	4	1
2	3	4	3	5	5	3	5	5	4	4	4	4	4	4	4	4	4	4	4	3	3	4	4	3	1	21	1	3	2
4	4	4	4	4	4	1	2	4	4	4	4	4	4	3	3	4	1	1	1	4	2	3	3	2	2	19	2	2	1
5	5	5	5	5	5	4	5	4	1	1	1	1	1	1	1	1	5	5	5	3	2	3	3	3	1	21	1	2	1
4	4	2	2	5	4	2	4	4	2	2	2	4	2	2	2	4	1	1	1	2	4	4	3	3	1	25	2	3	2
4	2	3	4	5	4	2	5	4	3	3	3	3	4	3	4	3	4	4	4	4	4	4	4	3	2	21	1	1	2
4	3	3	3	3	3	3	3	3	3	3	3	3	3	3	3	3	4	4	3	3	4	3	3	3	2	20	1	3	2
3	4	3	4	5	4	1	5	4	3	3	2	2	2	3	2	4	3	3	4	2	3	2	3	2	1	26	3	2	1
3	1	3	4	5	5	1	5	5	3	3	1	1	3	1	1	1	5	5	5	5	3	5	5	2	2	19	1	2	3
5	5	5	5	5	5	5	5	5	5	5	5	5	5	5	5	5	5	5	5	5	5	5	5	5	1	23	1	4	2
4	3	3	2	5	4	1	3	4	3	3	3	3	3	3	3	3	4	4	4	4	3	3	3	3	2	20	1	1	1
3	4	4	5	5	4	2	5	4	2	2	1	1	2	3	2	1	4	5	4	3	2	2	2	2	2	19	1	4	2
4	4	3	4	4	4	4	4	4	4	4	3	3	3	3	3	3	4	4	4	4	4	4	4	4	2	23	2	4	2
4	4	4	3	4	2	2	3	3	4	4	1	1	4	3	4	4	5	5	4	4	3	4	4	3	2	20	3	1	1
2	2	2	2	4	4	2	5	5	4	4	4	4	4	4	4	4	4	4	4	5	3	4	4	4	2	23	2	4	2
5	5	5	4	5	5	2	4	4	3	3	2	2	2	2	3	4	4	4	1	5	5	5	5	4	1	21	3	3	2
4	4	3	3	4	4	3	3	3	4	4	4	3	4	4	4	3	3	3	3	4	3	3	4	3	1	21	1	2	3
2	3	4	4	5	5	4	5	5	3	3	2	1	4	2	3	4	4	4	4	5	5	5	5	4	2	22	1	3	1
4	4	3	4	5	5	3	4	3	5	5	3	5	5	5	4	5	4	4	3	5	5	4	4	4	2	19	3	2	2
4	4	5	4	5	5	2	5	4	4	4	3	3	2	2	2	2	1	1	1	3	3	4	4	2	1	19	1	3	2
4	4	3	3	4	4	3	4	3	4	3	3	3	3	2	2	3	4	4	3	3	3	4	1	1	1	30	3	1	1
4	4	3	4	5	5	3	5	3	2	2	2	2	2	2	2	3	4	4	4	4	3	4	4	3	2	20	1	2	2
4	4	4	4	4	2	2	4	2	4	4	2	2	4	4	3	2	2	2	2	2	2	4	4	3	2	21	1	2	2
4	4	4	4	4	4	2	4	4	4	4	4	4	4	4	4	4	4	4	4	4	2	4	2	4	2	21	2	2	2
3	4	4	1	5	5	2	3	5	2	3	3	3	3	3	3	2	1	1	4	3	3	4	4	2	1	21	1	3	2
2	4	4	4	4	5	1	5	5	4	4	3	2	2	2	2	2	4	5	5	5	5	5	5	4	1	25	1	4	2
4	3	4	4	5	4	2	5	4	3	3	2	2	3	2	1	2	2	4	4	4	3	4	5	3	2	19	1	3	2
2	3	2	4	4	4	5	4	4	3	3	2	4	3	3	3	2	4	4	4	2	2	2	3	2	2	24	1	1	1
3	4	4	3	4	4	2	4	4	3	3	2	2	3	2	3	3	3	4	4	3	3	4	4	4	1	24	1	2	1
3	3	2	3	4	3	1	1	1	2	2	1	3	5	3	1	2	3	2	2	5	4	4	1	1	2	37	3	4	2
3	3	4	3	4	4	3	3	4	4	4	4	3	4	3	3	4	4	4	4	4	2	3	4	3	2	21	1	2	2
4	3	3	3	5	5	2	4	1	3	4	4	3	3	3	4	3	4	5	4	5	5	5	5	2	1	22	1	1	1
3	2	2	3	4	3	2	4	4	3	3	3	3	3	3	3	3	2	2	2	4	4	4	4	4	1	24	1	4	2
3	4	4	3	4	4	4	4	3	4	4	3	3	3	3	4	4	4	4	4	2	2	3	4	3	1	21	2	2	2
4	4	3	4	4	4	3	4	4	3	3	4	3	4	3	3	3	4	4	4	3	4	4	3	3	2	27	1	2	2
4	3	4	2	4	4	1	5	4	2	2	1	2	3	3	3	2	2	1	1	3	2	5	2	4	1	24	2	2	1
4	2	4	2	4	5	4	5	3	3	3	3	2	3	3	3	3	2	2	3	4	5	4	4	4	2	20	3	3	3
3	3	2	1	4	5	2	5	3	1	1	1	1	1	1	1	1	1	1	4	3	3	4	4	5	2	22	1	2	2
4	2	4	2	4	4	2	4	4	3	3	3	3	4	4	3	3	3	3	3	4	4	4	4	4	2	21	1	4	2
4	4	5	3	4	5	1	1	1	4	4	2	2	4	2	2	1	1	1	1	4	3	4	2	2	2	21	1	4	2
3	4	4	4	4	4	4	4	4	4	4	4	4	4	4	4	4	4	4	4	4	2	4	4	4	1	22	1	2	1
3	5	3	5	5	5	1	5	2	4	2	3	5	5	5	3	4	5	5	2	4	5	5	4	3	1	22	1	4	3
4	3	3	3	3	4	3	3	3	3	4	4	4	3	4	4	3	4	4	3	3	4	4	4	4	2	20	3	3	1
3	3	4	3	4	2	3	3	4	3	3	3	3	3	3	3	3	3	4	3	2	1	2	3	2	1	20	2	2	2
3	1	4	2	3	3	3	3	3	3	3	3	3	3	3	3	3	3	3	3	3	3	3	3	3	1	19	2	2	1
4	4	4	4	4	4	5	5	4	4	5	4	4	5	4	4	4	5	4	3	5	4	4	5	4	1	19	1	2	2
2	2	2	4	4	4	2	4	3	4	4	4	2	4	2	2	4	2	2	2	4	2	4	2	2	2	30	2	2	1
2	2	4	2	5	5	4	5	5	4	4	3	3	3	3	4	3	4	5	4	5	5	4	4	4	2	21	1	3	2
2	1	4	4	5	5	1	5	4	2	2	1	1	2	2	2	1	1	1	1	2	1	1	4	1	1	23	2	1	1
4	3	5	4	4	4	2	4	4	3	3	3	3	4	3	3	3	2	4	4	5	5	4	4	3	1	22	1	3	3
2	2	3	3	4	4	3	5	3	3	3	3	3	4	4	4	4	4	4	4	2	1	3	2	3	2	19	1	1	1
4	4	4	4	5	4	2	5	5	4	4	3	3	3	3	3	3	2	2	2	4	5	3	2	4	2	26	2	3	2
5	5	5	5	5	3	3	1	4	3	2	4	5	1	2	3	4	5	4	3	3	4	5	3	1	1	19	1	1	2
3	4	2	2	5	5	1	4	4	1	1	3	3	3	3	3	3	3	2	2	3	2	2	4	2	1	21	1	2	1
2	2	4	2	4	4	4	4	2	2	2	4	3	2	2	2	3	2	2	2	4	4	4	4	4	1	36	2	3	3
2	3	4	3	5	5	3	5	5	3	3	2	1	4	4	4	5	2	4	5	4	2	5	5	3	2	20	1	2	3
3	4	4	4	5	4	4	4	4	3	3	3	3	3	3	3	3	2	3	4	2	3	3	3	3	2	23	3	2	2
2	3	3	5	5	5	2	5	4	4	4	3	3	4	3	3	4	4	3	3	4	2	5	4	4	2	21	1	1	1
3	3	3	3	5	4	1	5	4	3	3	3	3	3	3	3	3	3	4	3	4	2	3	4	4	2	26	3	4	2
2	2	3	4	4	4	2	5	2	3	3	2	2	4	3	2	2	4	4	4	4	4	4	4	4	2	21	1	2	2
3	4	4	1	5	5	4	5	5	5	5	5	5	5	5	5	5	5	5	1	4	4	4	4	5	2	20	1	2	2
4	4	4	4	4	4	4	3	3	4	4	3	4	4	4	4	4	3	3	3	3	3	3	3	3	1	21	1	4	1
3	2	3	4	4	3	1	4	3	4	3	2	3	5	4	2	3	1	2	3	2	3	3	2	4	2	19	1	2	1
4	4	2	4	4	4	3	4	4	2	2	2	3	3	3	2	2	4	4	4	3	3	4	4	2	2	22	1	1	1
3	4	4	3	5	4	3	3	3	4	4	3	3	3	4	3	4	2	2	2	3	3	3	3	2	1	22	1	2	3
2	2	4	4	1	3	2	3	4	4	3	3	2	4	3	4	3	2	2	3	4	2	3	3	4	1	25	1	2	1
5	5	5	5	5	5	4	3	3	5	5	3	4	4	4	4	4	5	5	4	5	5	5	5	4	1	22	1	1	3
4	4	4	4	5	5	1	3	3	2	2	2	3	2	2	2	2	3	3	3	4	3	4	4	3	2	19	1	2	3
3	4	2	1	5	2	2	4	3	2	2	2	1	1	1	1	1	4	2	3	4	4	5	5	4	1	23	2	4	3
4	3	4	5	5	5	5	5	4	4	4	4	4	4	4	4	5	5	5	5	5	5	5	5	2	2	20	1	3	3
3	4	4	2	4	5	2	5	5	4	4	2	2	1	4	4	4	3	5	4	1	1	2	3	1	2	33	1	1	1
2	2	4	2	5	4	1	4	3	3	3	3	2	3	3	2	2	4	4	3	3	2	2	2	2	2	21	1	2	1
3	3	3	3	4	4	4	4	4	4	4	3	4	4	3	3	4	3	3	3	3	2	3	4	2	2	20	3	2	2
2	4	4	5	5	5	3	4	2	4	4	1	3	4	3	3	4	5	5	5	5	5	2	2	4	2	20	1	4	2
5	5	4	4	5	5	4	4	4	4	4	4	4	3	5	3	3	3	4	3	5	5	5	5	5	1	24	1	4	2
2	3	2	3	4	1	1	1	1	3	3	3	3	3	3	3	3	3	3	3	1	1	1	1	1	2	20	1	1	1
2	2	2	2	2	2	2	2	2	2	2	2	2	2	2	2	2	2	2	2	2	2	2	2	2	1	20	2	4	1
3	3	3	3	3	3	4	2	3	1	3	3	4	4	4	2	3	2	2	2	4	4	4	4	4	2	22	3	3	3
3	4	4	2	4	5	1	4	4	2	2	2	2	2	2	2	4	1	1	1	4	3	5	3	3	1	20	1	3	3
4	3	3	3	4	4	3	5	5	3	3	3	4	4	2	3	3	5	5	4	5	4	3	2	3	1	36	1	4	2
4	2	4	2	5	5	3	4	4	4	4	3	4	5	5	3	2	2	4	4	5	3	4	3	3	2	21	1	3	3
3	3	2	4	2	5	3	3	3	2	2	4	3	4	5	1	4	3	4	3	2	2	4	3	2	2	21	1	1	1
3	2	3	4	5	4	2	4	3	4	4	2	2	4	2	4	4	2	2	4	3	2	4	4	4	2	21	1	3	2
3	3	4	4	4	4	2	5	4	4	4	3	3	4	4	3	3	3	4	4	4	2	4	4	4	2	19	1	3	2
4	2	4	2	4	5	4	5	4	2	2	2	4	4	2	3	4	2	2	2	4	3	4	4	4	2	19	1	3	2
3	4	4	4	5	5	2	5	4	4	4	2	2	4	4	4	4	2	4	4	5	5	5	5	4	1	22	1	2	2
4	4	4	4	4	4	4	4	4	3	4	4	4	4	4	4	4	4	4	4	4	4	4	4	4	2	21	1	2	2
3	4	4	3	4	4	3	4	3	4	4	4	3	4	4	4	4	4	4	4	3	3	4	4	3	1	21	1	2	2
3	3	3	3	2	4	3	2	3	4	4	4	4	4	3	4	4	3	3	3	1	3	1	3	2	1	21	1	4	3
3	2	4	3	4	4	2	4	3	3	3	3	3	3	4	3	3	4	3	2	3	2	3	3	2	2	25	1	4	2
